# Supplementary material for: Metabolome Characteristics of Liver Autophagy Deficiency under Starvation Conditions in Infancy
Source: MDPI journal article supplement (doi:10.3390/nu13093026), 2021-08-29
Supplement: s1 [file s1]

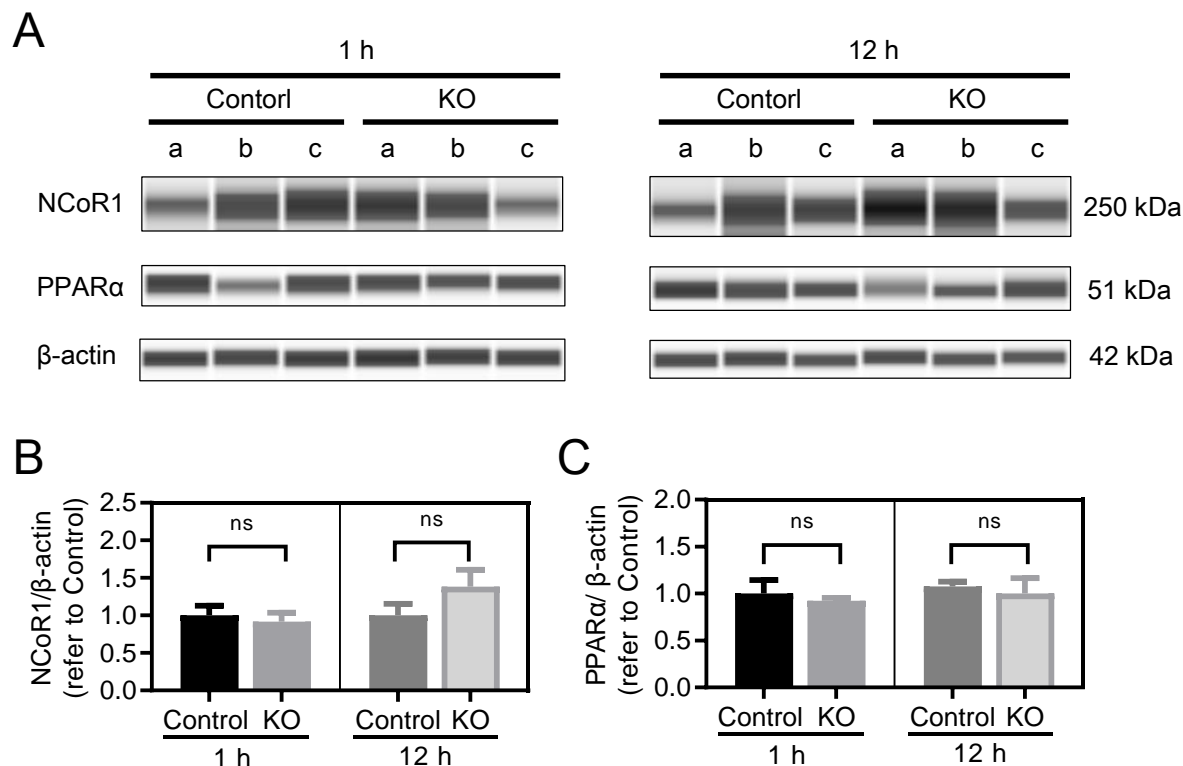

**Supplementary Figure S1. The automated Western blotting analysis of NCoR1 and PPAR $\alpha$  in the liver.** (A) The protein expression of NCoR1 and PPAR $\alpha$  in liver extract of Control and KO mice after 1 and 12 h of starvation (n = 3 at each starvation time point). The expression of NCoR1 (B) and PPAR $\alpha$  (C) refer to Control mice at 1 and 12 h of starvation were shown in graphs.  $\beta$ -actin was used as an internal control. Each bar is expressed as the mean  $\pm$  SEM. P, Student's t-test; KO: liver-specific *Atg5*-deficient; NCoR1: nuclear receptor co-repressor 1; PPAR $\alpha$ : peroxisome proliferator-activated receptor  $\alpha$ .

A

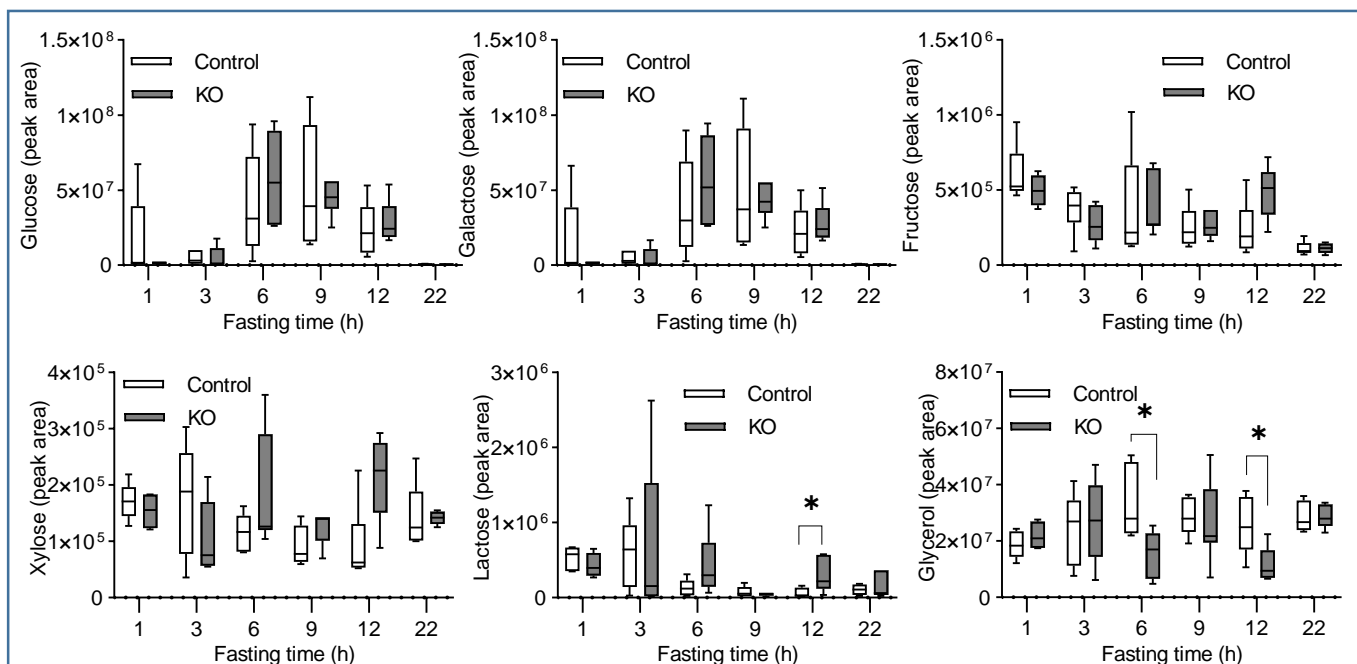

B

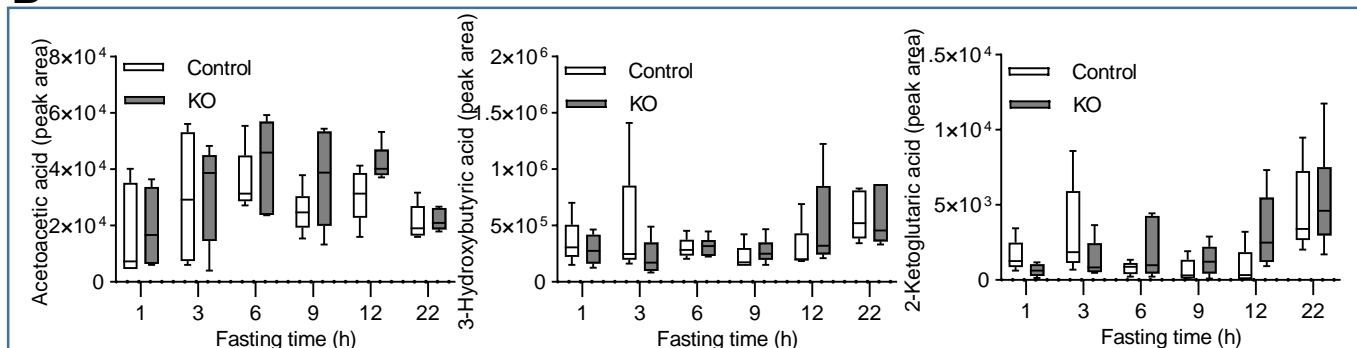

C

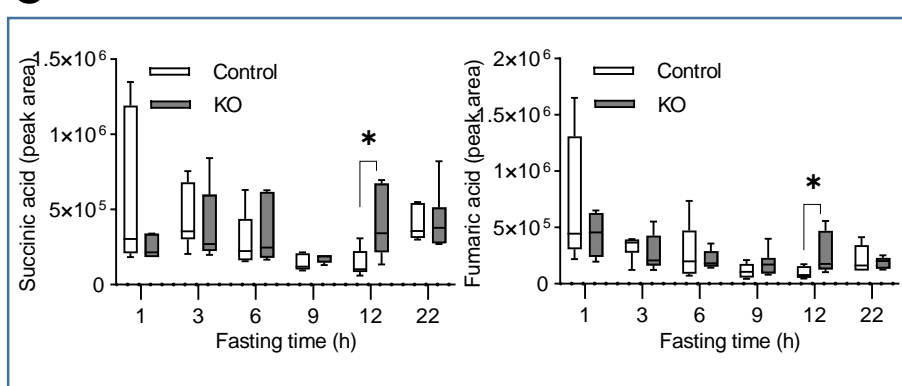

**Supplementary Figure S2. The trajectory course of serum (A) carbohydrates and glycerol, (B) ketone bodies and (C) Succinic acid and Fumaric acid by the GC-MS/MS analysis with 22-h starvation survivors**

The numbers of mice (starvation time) were as follows: 5 (1 h), 6 (3 h), 5 (6 h), 6 (9 h), 6 (12 h), and 5 (22 h) Control mice and 4 (1 h), 5 (3 h), 7 (6 h), 7 (9 h), 5 (12 h), and 6 (22 h) KO mice. The concentration of metabolites was measured as the peak area of the calibration curve, and the concentration at each starvation time was compared between the groups. Boxes represent the interquartile range (25th to 75th percentiles), and lines within the boxes are the median; error bars represent the 25th percentile minus 1.5 times interquartile range (IQR) and the 75th percentile plus 1.5 times IQR. Mann-Whitney U test; \* $P < 0.05$ , \*\* $P < 0.01$ . KO: liver-specific *Atg5*-deficient.

A

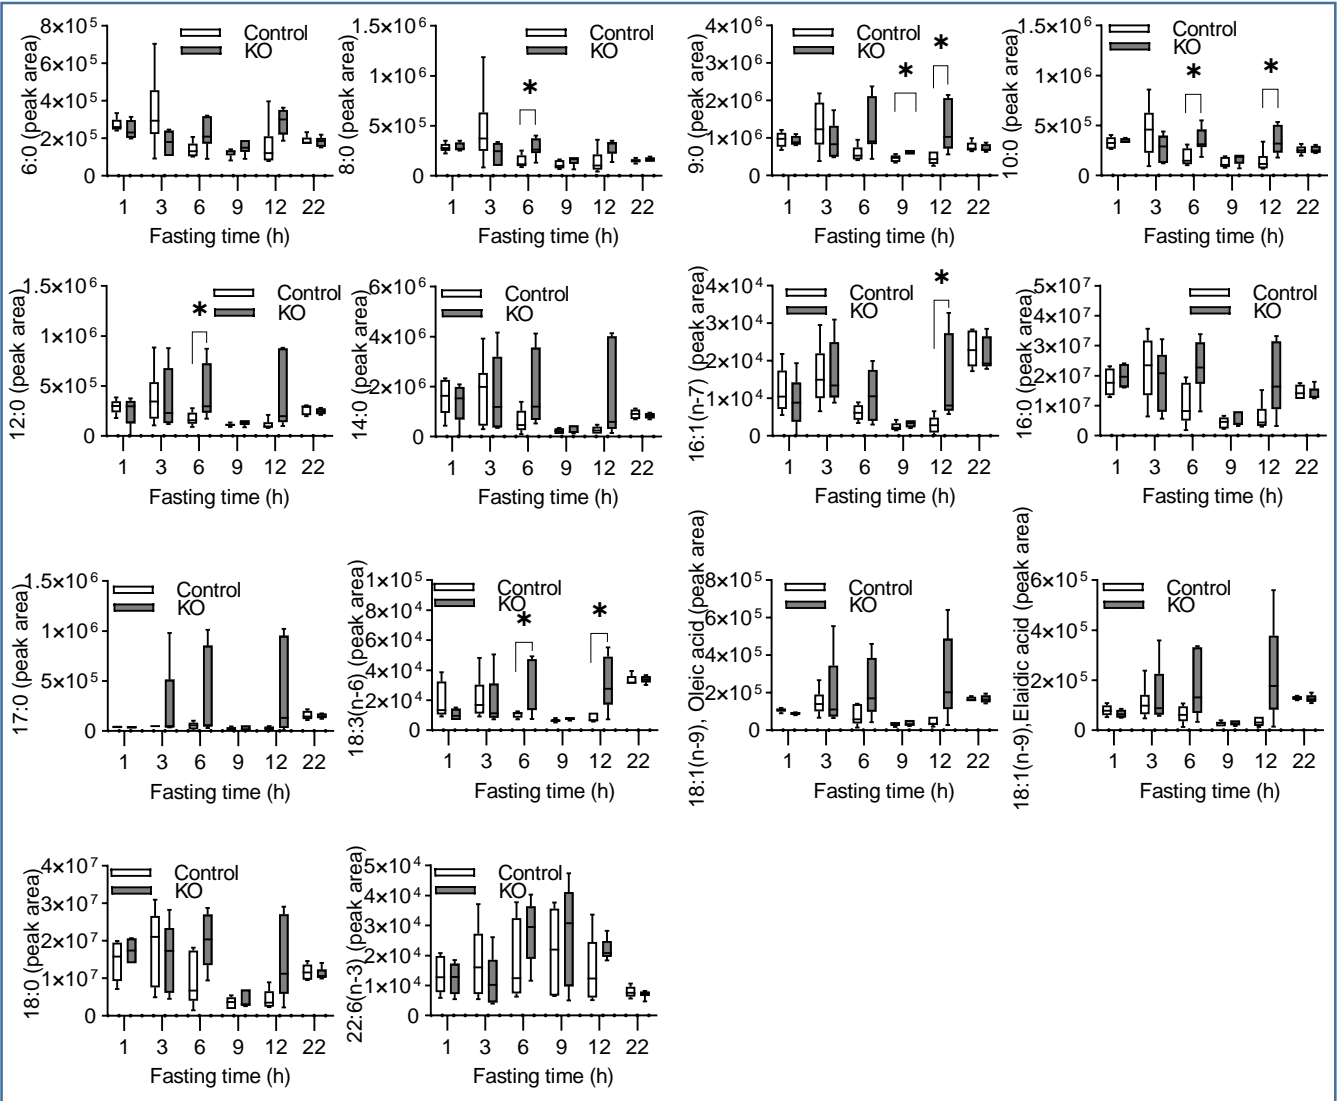

### Supplementary Figure S3. The trajectory course of serum FFAs with the GC-MS/MS analysis with 22-h starvation survivors

The numbers of mice (starvation time) were as follows: 5 (1 h), 6 (3 h), 5 (6 h), 6 (9 h), 6 (12 h), and 5 (22 h) Control mice and 4 (1 h), 5 (3 h), 7 (6 h), 7 (9 h), 5 (12 h), and 6 (22 h) KO mice. The concentration of metabolites was measured as the peak area of the calibration curve, and the concentration at each starvation time was compared between the groups. Boxes represent the interquartile range (25th to 75th percentiles), and lines within the boxes are the median; error bars represent the 25th percentile minus 1.5 times interquartile range (IQR) and the 75th percentile plus 1.5 times IQR. Mann-Whitney U test; \* $P < 0.05$ , \*\* $P < 0.01$ . KO: liver-specific *Atg5*-deficient.

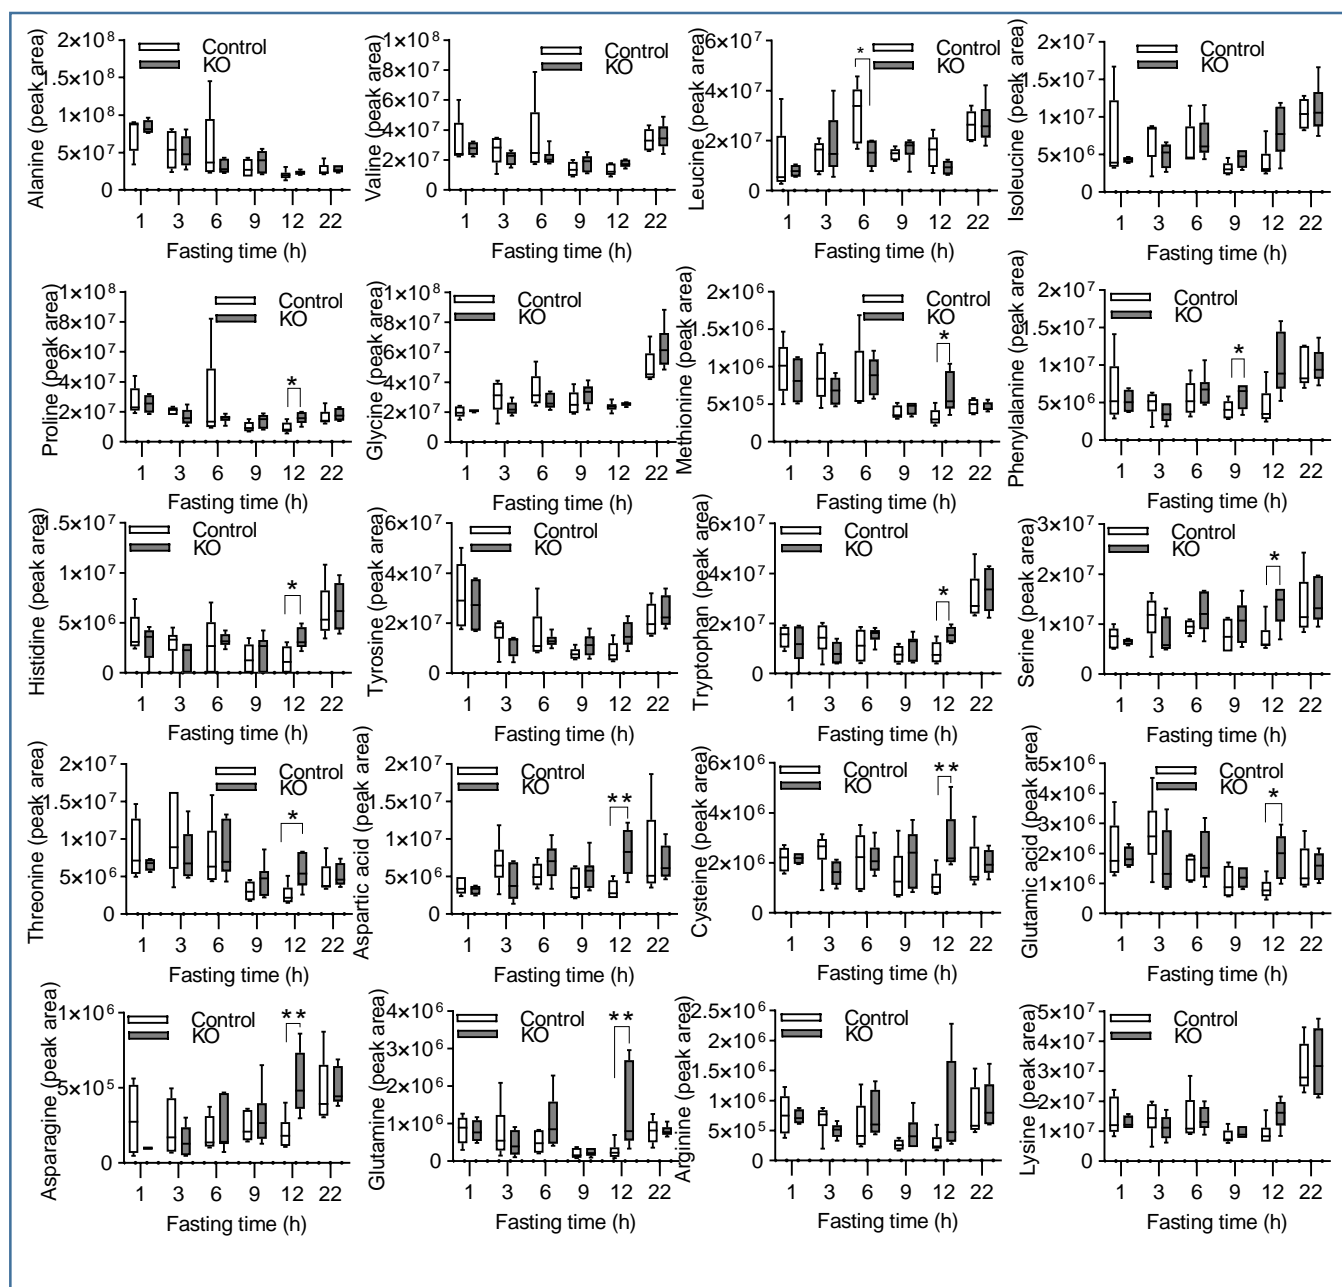

### Supplementary Figure S4. The trajectory course of serum 20 protein-coding amino acids with GC-MS/MS analysis with 22-h starvation survivors

The numbers of mice (starvation time) were as follows: 5 (1 h), 6 (3 h), 5 (6 h), 6 (9 h), 6 (12 h), and 5 (22 h) Control mice and 4 (1 h), 5 (3 h), 7 (6 h), 7 (9 h), 5 (12 h), and 6 (22 h) KO mice. The concentration of metabolites was measured as the peak area of the calibration curve, and the concentration at each starvation time was compared between the groups. Boxes represent the interquartile range (25th to 75th percentiles), and lines within the boxes are the median; error bars represent the 25th percentile minus 1.5 times interquartile range (IQR) and the 75th percentile plus 1.5 times IQR. Mann-Whitney U test ; \* $P < 0.05$ . KO: liver-specific *Atg5*-deficient.

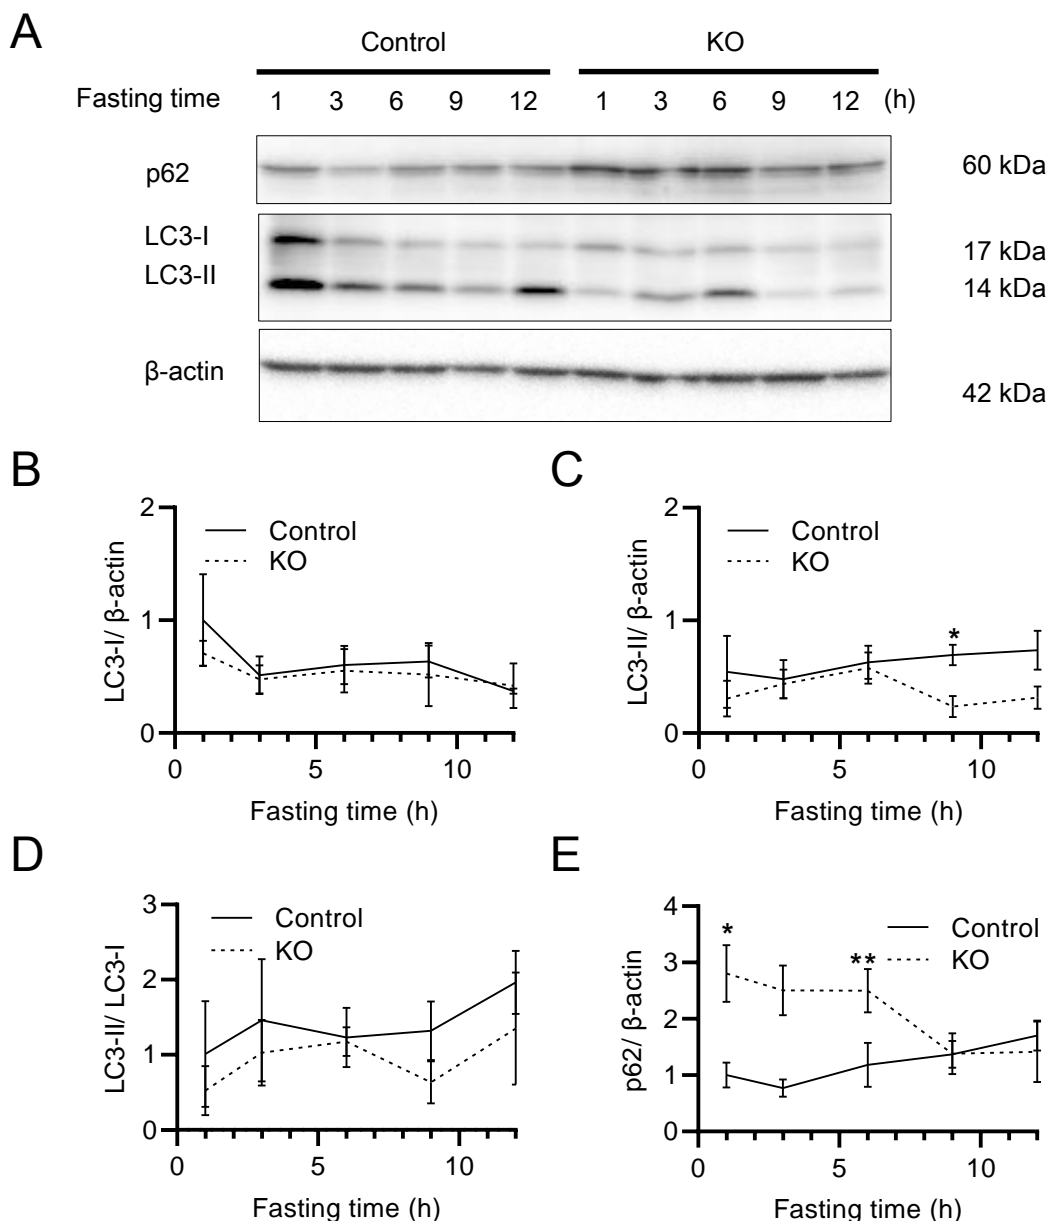

**Supplementary Figure S5. The Western blotting analysis of LC3, and p62 in extract protein of muscles.**

(A) The protein expression of LC3-I, LC3-II, and p62 in muscle after 1–12 h starvation ( $n = 4$  at each starvation time).  $\beta$ -actin was used as an internal control. The full-length blots are presented in Supplementary Figure S7. The relative expression of LC3-I (B) and LC3-II (C), LC3-II/LC3-I ratio (D), and p62 (E) are shown in graphs. Each bar is expressed as the mean  $\pm$  SEM. Student's t-test; \* $P < 0.05$ , \*\* $P < 0.01$ . KO: liver-specific *Atg5*-deficient; LC3: microtubule-associated protein 1A/1B-light chain 3; LC3-I: cytosolic form of LC3; LC3-II: phosphatidylethanolamine conjugate form of LC3.

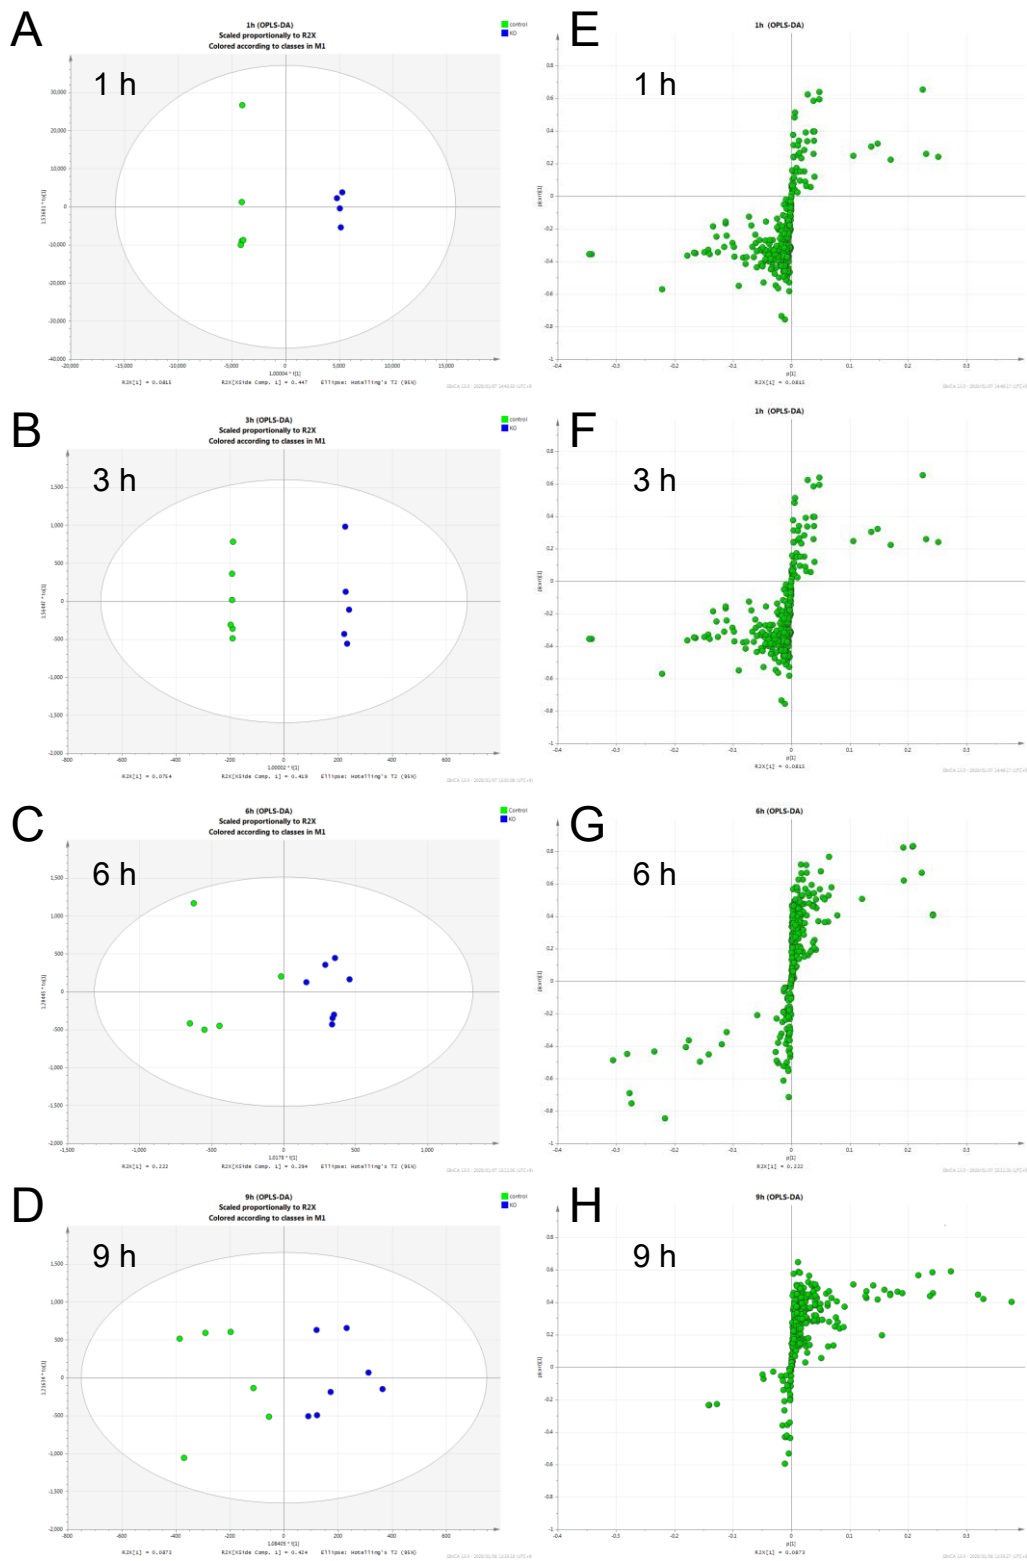

## Supplementary Figure S6. Multivariate statistical and pathway analyses (OPLS-DA) of serum metabolites at each starvation timepoint

(A-D) Score scatter plots of serum metabolites from the liver-specific *Atg5*-deficient (KO, blue dot) and Control groups (green dot) at 1 h (A), 3 h (B), 6 h (C), and 9 h (D) of starvation. A differential metabolic pattern was noted between KO and Control mice by the two plots clearly separated on the score scatter plot. (E-H) S-plots of serum metabolites from the KO and Control groups at 1 h (E), 3 h (F), 6 h (G), and 9 h (H) of starvation. The number of significant metabolites with  $|p(\text{corr})| > 0.7$  at each timepoint was less than that of 12-hour starvation. OPLS-DA: orthogonal partial least squares discriminant analysis; KO: liver-specific *Atg5*-deficient.

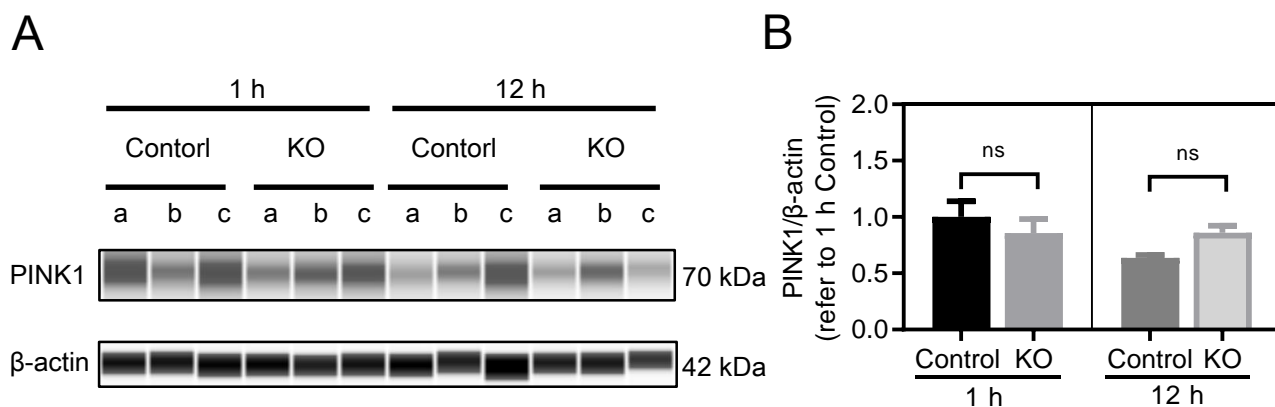

**Supplementary Figure S7. The automated Western blotting analysis of PINK1 in the liver.**

(A) The protein expression of PINK1 in liver extract of Control and KO mice after 1 and 12 h of starvation ( $n = 3$  at each starvation time point). (B) The expression of PINK1 and at 1 and 12 h of starvation refer to 1 h Control mice were shown in graphs.  $\beta$ -actin was used as an internal control. Each bar is expressed as the mean  $\pm$  SEM. P, Student's t-test; KO: liver-specific *Atg5*-deficient; PINK1: PTEN-induced putative kinase 1.

**Supplementary Table S1.** Metabolites significantly differed according to S-plot analysis Control vs. KO mice at each starvation time.

| starvation duration | A     | N  | R <sup>2</sup> X (cum) | R <sup>2</sup> Y (cum) | Q <sup>2</sup> (cum) |
|---------------------|-------|----|------------------------|------------------------|----------------------|
| 1 h                 | 1+5+0 | 9  | 0.986                  | 0.999                  | 0.116                |
| 3 h                 | 1+7+0 | 11 | 0.989                  | 0.999                  | 0.161                |
| 6 h                 | 1+2+0 | 12 | 0.694                  | 0.850                  | 0.433                |
| 9 h                 | 1+2+0 | 13 | 0.769                  | 0.796                  | 0.0238               |
| 12 h                | 1+4+0 | 11 | 0.960                  | 0.990                  | 0.163                |

OPLS-DA: orthogonal partial least squares discriminant analysis; KO: liver-specific *Atg5*-deficient.



**Supplementary Table S2.** Metabolites significantly differed according to S-plot analysis Control vs. KO mice at each starvation time.

| Var ID<br>(Primary) | metabolite                 | p[1]     | p(corr)  | Var ID<br>(Primary) | metabolite                        | p[1]     | p(corr)  |
|---------------------|----------------------------|----------|----------|---------------------|-----------------------------------|----------|----------|
| 1 h, control > KO   |                            |          |          | 12 h, control < KO  |                                   |          |          |
| 107                 | Dihydrouracil-TMS          | -0.01141 | -0.75722 | 263                 | Ornithine-4TMS                    | 0.17683  | 0.74577  |
| 388                 | Oleic acid-TMS             | -0.01732 | -0.73572 | 403                 | Cystine-4TMS                      | 0.02478  | 0.74305  |
| 3 h, control > KO   |                            |          |          | 122                 | Threitol-4TMS                     | 0.01018  | 0.74165  |
| 155                 | O-Phosphoethanolamine-3TMS | -0.01174 | -0.77125 | 396                 | Tryptophan-3TMS                   | 0.17128  | 0.73822  |
| 253                 | 2-Deoxy-glucose-4TMS       | -0.02405 | -0.70130 | 196                 | Lyxose-meto-4TMS                  | 0.02697  | 0.73355  |
| 6 h, control < KO   |                            |          |          | 175                 | Glutamic acid-3TMS                | 0.06575  | 0.73231  |
| 312                 | Allose-meto-5TMS           | 0.20847  | 0.83128  | 431                 | Serotonin                         | 0.03702  | 0.73056  |
| 322                 | Glucose-meto-5TMS          | 0.20847  | 0.83126  | 247                 | Dihydroorotic acid-3TMS           | 0.01064  | 0.72521  |
| 319                 | Galactose-meto-5TMS        | 0.20769  | 0.82792  | 190                 | N-Acetylaspartic acid-2TMS        | 0.01014  | 0.72162  |
| 313                 | Mannose-meto-5TMS          | 0.19118  | 0.82189  | 86                  | Serine-3TMS                       | 0.16310  | 0.72124  |
| 309                 | N-Acetylglutamine-3TMS     | 0.06403  | 0.76646  | 440                 | Batyl alcohol-2TMS                | 0.00919  | 0.71959  |
| 355                 | Gluconic acid-6TMS         | 0.01658  | 0.71804  | 333                 | Glucuronic acid-meto-5TMS         | 0.05643  | 0.71790  |
| 60                  | Octanoic acid-TMS          | 0.02562  | 0.71698  | 437                 | Inosine-4TMS                      | 0.06958  | 0.71788  |
| 6 h, cotrol > KO    |                            |          |          | 328                 | Mannitol-6TMS                     | 0.02347  | 0.71638  |
| 62                  | 2-Aminoethanol-3TMS        | -0.21632 | -0.84693 | 339                 | Galacturonic acid-meto-5TMS       | 0.05714  | 0.71597  |
| 63                  | Leucine-2TMS               | -0.27356 | -0.75216 | 358                 | Glucaric acid-6TMS                | 0.01198  | 0.71474  |
| 40                  | Glyceraldehyde-meto-2TMS   | -0.00423 | -0.71479 | 359                 | Allantoin-3TMS                    | 0.01721  | 0.71434  |
| 12 h, control < KO  |                            |          |          | 223                 | Aconitic acid-3TMS                | 0.00594  | 0.71427  |
| 243                 | Ribonic acid-5TMS          | 0.02938  | 0.79801  | 144                 | Threonine acid-4TMS               | 0.07346  | 0.71411  |
| 199                 | Homocysteine-3TMS          | 0.01356  | 0.78809  | 189                 | 2-Ketoglutaric acid-oxime-3TMS    | 0.00241  | 0.71336  |
| 265                 | Dopamine-3TMS              | 0.04672  | 0.78808  | 348                 | Galacturonic acid-meto-5TMS       | 0.05448  | 0.71330  |
| 137                 | 4-Aminobutyric acid-3TMS   | 0.03628  | 0.78633  | 208                 | Taurine-13C2-3TMS                 | 0.13807  | 0.71319  |
| 150                 | Creatinine-3TMS            | 0.09444  | 0.78323  | 113                 | Citramalic acid-3TMS              | 0.00809  | 0.71142  |
| 128                 | 3-Aminoglutaric acid-2TMS  | 0.15668  | 0.78298  | 149                 | 2-Hydroxyglutaric acid-3TMS       | 0.02619  | 0.70978  |
| 130                 | Aspartic acid-3TMS         | 0.14681  | 0.78063  | 242                 | 1-Methylhistamine dihydrochloride | 0.02127  | 0.70818  |
| 451                 | Guanosine-5TMS             | 0.01388  | 0.77790  | 106                 | Decanoic acid-TMS                 | 0.02908  | 0.70778  |
| 169                 | 3-Aminoglutaric acid-3TMS  | 0.01918  | 0.77303  | 300                 | Allantoin-4TMS                    | 0.02817  | 0.70701  |
| 226                 | Orotic acid-3TMS           | 0.01075  | 0.77204  | 254                 | 2-Aminopimelic acid-3TMS          | 0.05809  | 0.70661  |
| 200                 | Asparagine-3TMS            | 0.03729  | 0.75772  | 74                  | Proline-2TMS                      | 0.16142  | 0.70607  |
| 241                 | Homovanillic acid-2TMS     | 0.00715  | 0.75634  | 344                 | Glucuronic acid-meto-5TMS         | 0.02416  | 0.70395  |
| 277                 | Tagatose-meto-5TMS         | 0.00947  | 0.75407  | 454                 | Maltose-meto-8TMS                 | 0.05947  | 0.70199  |
| 80                  | Catechol-2TMS              | 0.00375  | 0.75161  | 447                 | Lactose-meto-8TMS                 | 0.00384  | 0.70140  |
| 206                 | Taurine-3TMS               | 0.17443  | 0.75102  | 452                 | Trehalose-8TMS                    | 0.11327  | 0.70117  |
| 276                 | 1,5-Anhydro-glucitol-4TMS  | 0.01269  | 0.75064  | 91                  | Threonine-3TMS                    | 0.11286  | 0.70069  |
|                     |                            |          |          | 457                 | Maltose-meto-8TMS                 | 0.05003  | 0.70019  |
|                     |                            |          |          | 12 h, control > KO  |                                   |          |          |
|                     |                            |          |          | 400                 | Tryptamine-3TMS                   | -0.04133 | -0.82715 |

KO: liver-specific *Atg5*-deficient; TMS: trimethylsilyl.
